# Supplementary material for: HSP Transcript and Protein Accumulation in Brassinosteroid Barley Mutants Acclimated to Low and High Temperatures
Source: MDPI journal article supplement (doi:10.3390/ijms21051889), 2020-03-10
Supplement: s1 [file s1]

Table S2. Changes in the accumulation of the HSP90 and HSP70 proteins in barley in relation to a mutation and the temperature of growth (+ increase compared to the wild type; – decrease compared to the wild type; NC not changed compared to the wild type). The plant material in our studies included the barley (*Hordeum vulgare* L.) BR-deficient mutant 522DK (mutation in the *HvDWARF* gene) from the Delisa cultivar, the barley BR-deficient mutant BW084 (mutation in the *HvCPD* gene), the BR-signalling defective mutant (BW312, mutation in the *HvBRI1* gene) and their reference cultivar Bowman.

| Protein                              | Genetic mutation |      |       |              |      |       |               |      |       |
|--------------------------------------|------------------|------|-------|--------------|------|-------|---------------|------|-------|
|                                      | <i>HvDWARF</i>   |      |       | <i>HvCPD</i> |      |       | <i>HvBRI1</i> |      |       |
|                                      | 20 °C            | 5 °C | 27 °C | 20 °C        | 5 °C | 27 °C | 20 °C         | 5 °C | 27 °C |
| <b>HSP90</b><br>(cell membrane)      | +                | +    | NC    | NC           | -    | +     | -             | -    | -     |
| <b>HSP70</b><br>(cell membrane)      | -                | -    | +     | -            | +    | +     | -             | -    | -     |
| <b>HSP70</b><br>(cytosolic fraction) | +                | +    | +     | +            | -    | +     | +             | -    | NC    |
