# Supplementary material for: HSP Transcript and Protein Accumulation in Brassinosteroid Barley Mutants Acclimated to Low and High Temperatures
Source: MDPI journal article supplement (doi:10.3390/ijms21051889), 2020-03-10
Supplement: s1 [file s1]

Table S1. Changes in the accumulation of the *HSP90*, *HSP70*, *HSP18* and *HSP17* transcripts in barley in relation to a mutation and the temperature of growth (+ increase compared to the wild type; – decrease compared to the wild type; NC not changed compared to the wild type). The plant material in our studies included the barley (*Hordeum vulgare* L.) BR-deficient mutant 522DK (mutation *HvDWARF*) from the Delisa cultivar, the barley BR-deficient mutant BW084 (mutation in the *HvCPD* gene), the BR-signalling defective mutant (BW312, mutation in the *HvBR11* gene) and their reference cultivar Bowman. < LOD below limit of detection

| Transcript   | Genetic mutation |                   |                   |                   |                   |              |                   |                   |                   |                   |               |                   |                   |                   |                   |
|--------------|------------------|-------------------|-------------------|-------------------|-------------------|--------------|-------------------|-------------------|-------------------|-------------------|---------------|-------------------|-------------------|-------------------|-------------------|
|              | <i>HvDWARF</i>   |                   |                   |                   |                   | <i>HvCPD</i> |                   |                   |                   |                   | <i>HvBR11</i> |                   |                   |                   |                   |
|              | 20 °C            | 5 °C<br>(10 days) | 5 °C<br>(21 days) | 27 °C<br>(3 days) | 27 °C<br>(7 days) | 20 °C        | 5 °C<br>(10 days) | 5 °C<br>(21 days) | 27 °C<br>(3 days) | 27 °C<br>(7 days) | 20 °C         | 5 °C<br>(10 days) | 5 °C<br>(21 days) | 27 °C<br>(3 days) | 27 °C<br>(7 days) |
| <i>HSP90</i> | -                | NC                | -                 | NC                | +                 | NC           | -                 | NC                | -                 | -                 | -             | -                 | -                 | -                 | -                 |
| <i>HSP70</i> | -                | -                 | -                 | -                 | -                 | NC           | -                 | -                 | -                 | +                 | NC            | -                 | -                 | -                 | NC                |
| <i>HSP18</i> | NC               | <LOD              | <LOD              | +                 | +                 | +            | <LOD              | <LOD              | -                 | -                 | NC            | <LOD              | <LOD              | -                 | -                 |
| <i>HSP17</i> | NC               | NC                | NC                | +                 | NC                | +            | +                 | NC                | -                 | NC                | NC            | NC                | NC                | -                 | NC                |
